# Supplementary material
Source: Springer Nature journal article supplement (https://www.springermedizin.de/resource/supplementary/12885_2009_1943_MOESM2_ESM.pdf/9460148)
Supplement: MOESM2 [file 9460148]

**Health Promotion –  
Knowledge, Attitude and  
Practice survey for adults  
(HP-KAP survey)  
N=7,802**

**Women  
N=4,292**

Men  
N= 3,510

**Age ≥ 40  
N=2,609**

Age < 40  
N=1,683

**Responses to  
questionnaire on  
breast cancer  
screening practice  
N=2,583**

No responses to questionnaire  
on breast cancer screening  
practice N=7  
Breast cancer patients N= 19
